# Supplementary material
Source: publisher figshare collection journal article supplement (https://acs.figshare.com/ndownloader/files/17441762)
Supplement: Supplementary file 1 [file 17441762]

## SUPPORTING INFORMATION

### **Volumetric properties and sorption behavior of perfluoropolymers with dioxolane pendant rings**

Yafei Li<sup>1</sup>, Milad Yavari<sup>2</sup>, Antonio Baldanza<sup>3</sup>, Ernesto Di Maio<sup>3</sup>, Yoshiyuki Okamoto<sup>4</sup>,

Haiqing Lin<sup>2</sup> and Michele Galizia<sup>1\*</sup>

<sup>1</sup> *School of Chemical, Biological and Materials Engineering, University of Oklahoma, Norman, OK, 73019, USA*

<sup>2</sup> *Department of Chemical and Biological Engineering, University at Buffalo, The State University of New York, Buffalo, NY, 14260, USA*

<sup>3</sup> *Department of Chemical, Materials and Manufacturing Engineering, University of Naples, Napoli, 80125, Italy*

<sup>4</sup> *Department of Chemical and Biomolecular Engineering, New York University, Brooklyn, NY, 11201, USA*

\* Corresponding Author: prof. Michele Galizia, [mgalizia@ou.edu](mailto:mgalizia@ou.edu)

## Membranes synthesis and fabrication

Poly(PFMD) and poly(PFMMD) were synthesized via radical polymerization from perfluoro-2-methylene-1,3-dioxolane and perfluoro-2-methylene-4-methyl-1,3-dioxolane, respectively.<sup>1</sup> The average molecular weight of poly(PFMMD),  $1.0 \times 10^6$  g/mol, was determined using the Mark-Houwink method.<sup>1</sup> The molecular weight of poly(PFMD) cannot be determined, as it is not soluble in any solvents.<sup>1</sup>

Flat poly(PFMMD) films, about 50  $\mu\text{m}$  thick, were fabricated via solution casting from a 5 wt% solution in hexafluorobenzene.<sup>1</sup> To ensure complete solvent removal, nascent membranes were first dried in air and then under vacuum at 80°C overnight. Poly(PFMD) films were prepared via compression molding at 250°C, due to the lack of polymer solubility in any solvents.

**Table S1.** Relevant NELF model parameters and equations.

| symbol                                  | property                                                                                                                                                               | definition                                                                                                          |
|-----------------------------------------|------------------------------------------------------------------------------------------------------------------------------------------------------------------------|---------------------------------------------------------------------------------------------------------------------|
| $M_i$                                   | Molar mass of species $i$                                                                                                                                              |                                                                                                                     |
| $\rho_i$                                | Density of species $i$                                                                                                                                                 |                                                                                                                     |
| $\rho$                                  | Density of the mixture                                                                                                                                                 |                                                                                                                     |
| $\omega_i$                              | Mass fraction of species $i$                                                                                                                                           |                                                                                                                     |
| $T_i^*$                                 | Characteristic temperature of pure component $i$                                                                                                                       |                                                                                                                     |
| $p_i^*$                                 | Characteristic pressure of pure component $i$                                                                                                                          |                                                                                                                     |
| $\rho_i^*$                              | Characteristic density of pure component $i$                                                                                                                           |                                                                                                                     |
| $\Phi_i$                                | Volume fraction of species $i$ at close packed conditions                                                                                                              | $\Phi_i = \frac{\omega_i / \rho_i^*}{\sum_i \omega_i / \rho_i^*}$                                                   |
| $k_{ij}$                                | Binary parameter                                                                                                                                                       |                                                                                                                     |
| $r_i^0$                                 | Number of lattice cells occupied by a molecule of pure component $i$                                                                                                   |                                                                                                                     |
| $r_i$                                   | Number of lattice cells occupied by a molecule in mixture                                                                                                              |                                                                                                                     |
| $\tilde{T}_i$                           | Reduced temperature of pure component $i$                                                                                                                              | $\tilde{T}_i = \frac{T}{T_i^*}$                                                                                     |
| $\tilde{p}_i$                           | Reduced pressure of pure component $i$                                                                                                                                 | $\tilde{p}_i = \frac{p}{p_i^*}$                                                                                     |
| $\tilde{\rho}_i$                        | Reduced density of pure component $i$                                                                                                                                  | $\tilde{\rho}_i = \frac{\rho_i}{\rho_i^*}$                                                                          |
| $\tilde{T}$                             | Reduced temperature of the mixture                                                                                                                                     | $\tilde{T} = \frac{T}{T^*}$                                                                                         |
| $\tilde{p}$                             | Reduced pressure of the mixture                                                                                                                                        | $\tilde{p} = \frac{p}{p^*}$                                                                                         |
| $\tilde{\rho}$                          | Reduced density of the mixture                                                                                                                                         | $\tilde{\rho} = \frac{\rho}{\rho^*}$                                                                                |
| $v_i^*$                                 | Volume occupied by a mole of lattice site of pure component $i$                                                                                                        | $v_i^* = \frac{RT_i^*}{p_i^*}$                                                                                      |
| Mixing rules (for binary mixtures)      |                                                                                                                                                                        |                                                                                                                     |
| $T^*$                                   | Characteristic temperature                                                                                                                                             | $T^* = \frac{p^*}{\frac{\Phi_1 p_1^*}{T_1^*} + \frac{\Phi_2 p_2^*}{T_2^*}}$                                         |
| $p^*$                                   | Characteristic pressure                                                                                                                                                | $p^* = \Phi_1 p_1^* + \Phi_2 p_2^* - \Phi_1 \Phi_2 \left[ p_1^* + p_2^* - 2(1 - k_{12}) \sqrt{p_1^* p_2^*} \right]$ |
| $\rho^*$                                | Characteristic density                                                                                                                                                 | $\frac{1}{\rho^*} = \frac{\omega_1}{\rho_1^*} + \frac{\omega_2}{\rho_2^*}$                                          |
| Relevant NELF model equations           |                                                                                                                                                                        |                                                                                                                     |
| LF equation of state for pure penetrant | $\tilde{\rho}_1 = 1 - \exp \left[ -\frac{\tilde{\rho}_1^2}{\tilde{T}_1} - \frac{\tilde{p}_1}{\tilde{T}_1} - \tilde{\rho}_1 \left( 1 - \frac{1}{r_1^0} \right) \right]$ |                                                                                                                     |

|                                                                               |                                                                                                                                                                                                                                                        |
|-------------------------------------------------------------------------------|--------------------------------------------------------------------------------------------------------------------------------------------------------------------------------------------------------------------------------------------------------|
|                                                                               |                                                                                                                                                                                                                                                        |
| <i>Pure penetrant<br/>equilibrium<br/>chemical potential</i>                  | $\frac{\mu_1^0}{RT} = r_1^0 \left[ -\frac{\tilde{\rho}_1}{\tilde{T}_1} + \frac{\tilde{p}_1}{\tilde{T}_1 \tilde{\rho}_1} + \frac{1}{r_1^0} \ln \tilde{\rho}_1 + \frac{1-\tilde{\rho}_1}{\tilde{\rho}_1} \ln(1-\tilde{\rho}_1) \right]$                  |
| <i>Non-equilibrium<br/>chemical potential<br/>of species i in<br/>mixture</i> | $\frac{\mu_i^{ne}}{RT} = \ln(\tilde{\rho}\phi_i) - \left( r_i^0 + \frac{r_i - r_i^0}{\tilde{\rho}} \right) \ln(1-\tilde{\rho}) - r_i - \tilde{\rho} \frac{r_i^0 v_i^*}{RT} \left[ p_i^* + \sum_{j=1}^{N_p+1} \phi_j (p_j^* - \Delta p_{ij}^*) \right]$ |

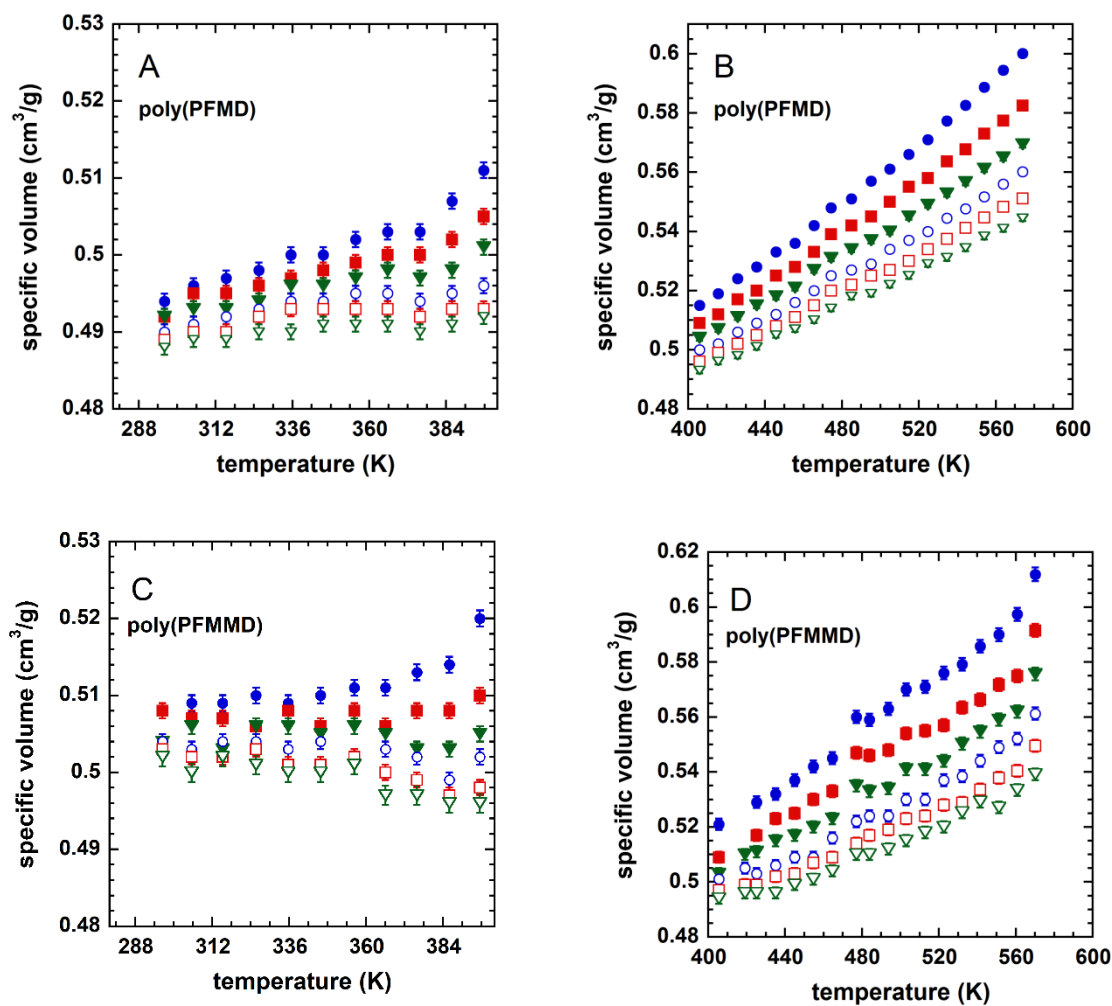

**Figure S1.** Experimental  $pVT$  data for poly(PFMD) in the glassy (A) and rubbery region (B). Experimental  $pVT$  data for poly(PFMMD) in the glassy (C) and rubbery region (D). Experimental uncertainties are reported as well.

**Table S2.** Binary parameters and swelling coefficients estimated from the NELF analysis.

| <i>penetrant</i>                  | <i>k<sub>ij</sub></i> |                     | <i>k<sub>sw</sub></i> (MPa <sup>-1</sup> ) |                     |
|-----------------------------------|-----------------------|---------------------|--------------------------------------------|---------------------|
|                                   | <i>poly</i> (PFMD)    | <i>poly</i> (PFMMD) | <i>poly</i> (PFMD)                         | <i>poly</i> (PFMMD) |
| <i>Ar</i>                         | 0.09 ± 0.02           | 0.07 ± 0.02         | 0                                          | 0                   |
| <i>CH<sub>4</sub></i>             | 0.045 ± 0.007         | 0.07 ± 0.01         | 0                                          | 0                   |
| <i>C<sub>2</sub>H<sub>6</sub></i> | 0.045 ± 0.004         | 0.09 ± 0.005        | 0.008 ± 0.0008                             | 0.007 ± 0.0005      |
| <i>C<sub>2</sub>H<sub>4</sub></i> | /                     | 0.08 ± 0.005        | /                                          | 0                   |
| <i>CO<sub>2</sub></i>             | -0.04 ± 0.005         | -0.025 ± 0.01       | 0.007 ± 0.0005                             | 0.005 ± 0.0002      |

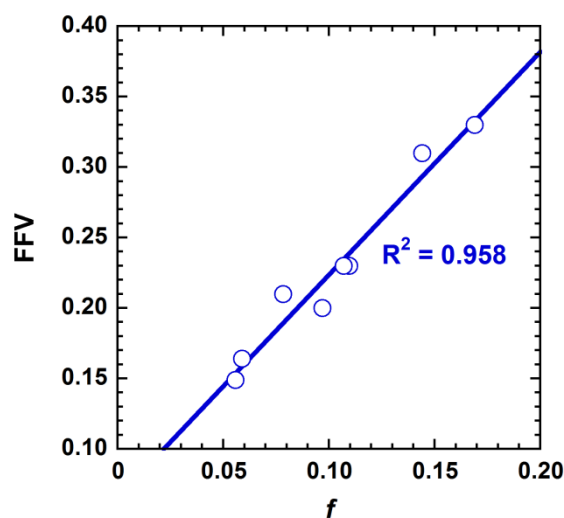

Figure S2. FFV vs.  $f$  for several polymers.

The definition of fractional free volume (FFV) is:

$$FFV = (\hat{V} - \hat{V}_0)/\hat{V}_0$$

where  $\hat{V}$  and  $\hat{V}_0$  are the polymer specific volume and the volume occupied by polymer chains, respectively. The lattice fluid definition of fractional free volume,  $f$ , is:

$$f = \frac{\rho_2^* - \rho_2^0}{\rho_2^*}$$

where  $\rho_2^*$  and  $\rho_2^0$  are the lattice fluid characteristic density (i.e., the polymer density at 0K, where the chain packing is maximum) and the polymer density at room temperature, respectively.

Obviously  $FFV$  and  $f$  values do not match to each other, as they are defined and calculated in a completely different way. However, as shown in Fig. S2, they are linearly related.

## References

1. Yavari, M.; Fang, M.; Nguyen, H.; Merkel, T. C.; Lin, H.; Okamoto, Y. Dioxolane-based perfluoropolymers with superior membrane gas separation properties. *Macromolecules* **2018**, *51*, 2489.
